# Supplementary material for: Mutational signature of extracranial meningioma metastases and their respective primary tumors
Source: Springer Nature journal article supplement (doi:10.1186/s40478-023-01505-0), 2023-01-14

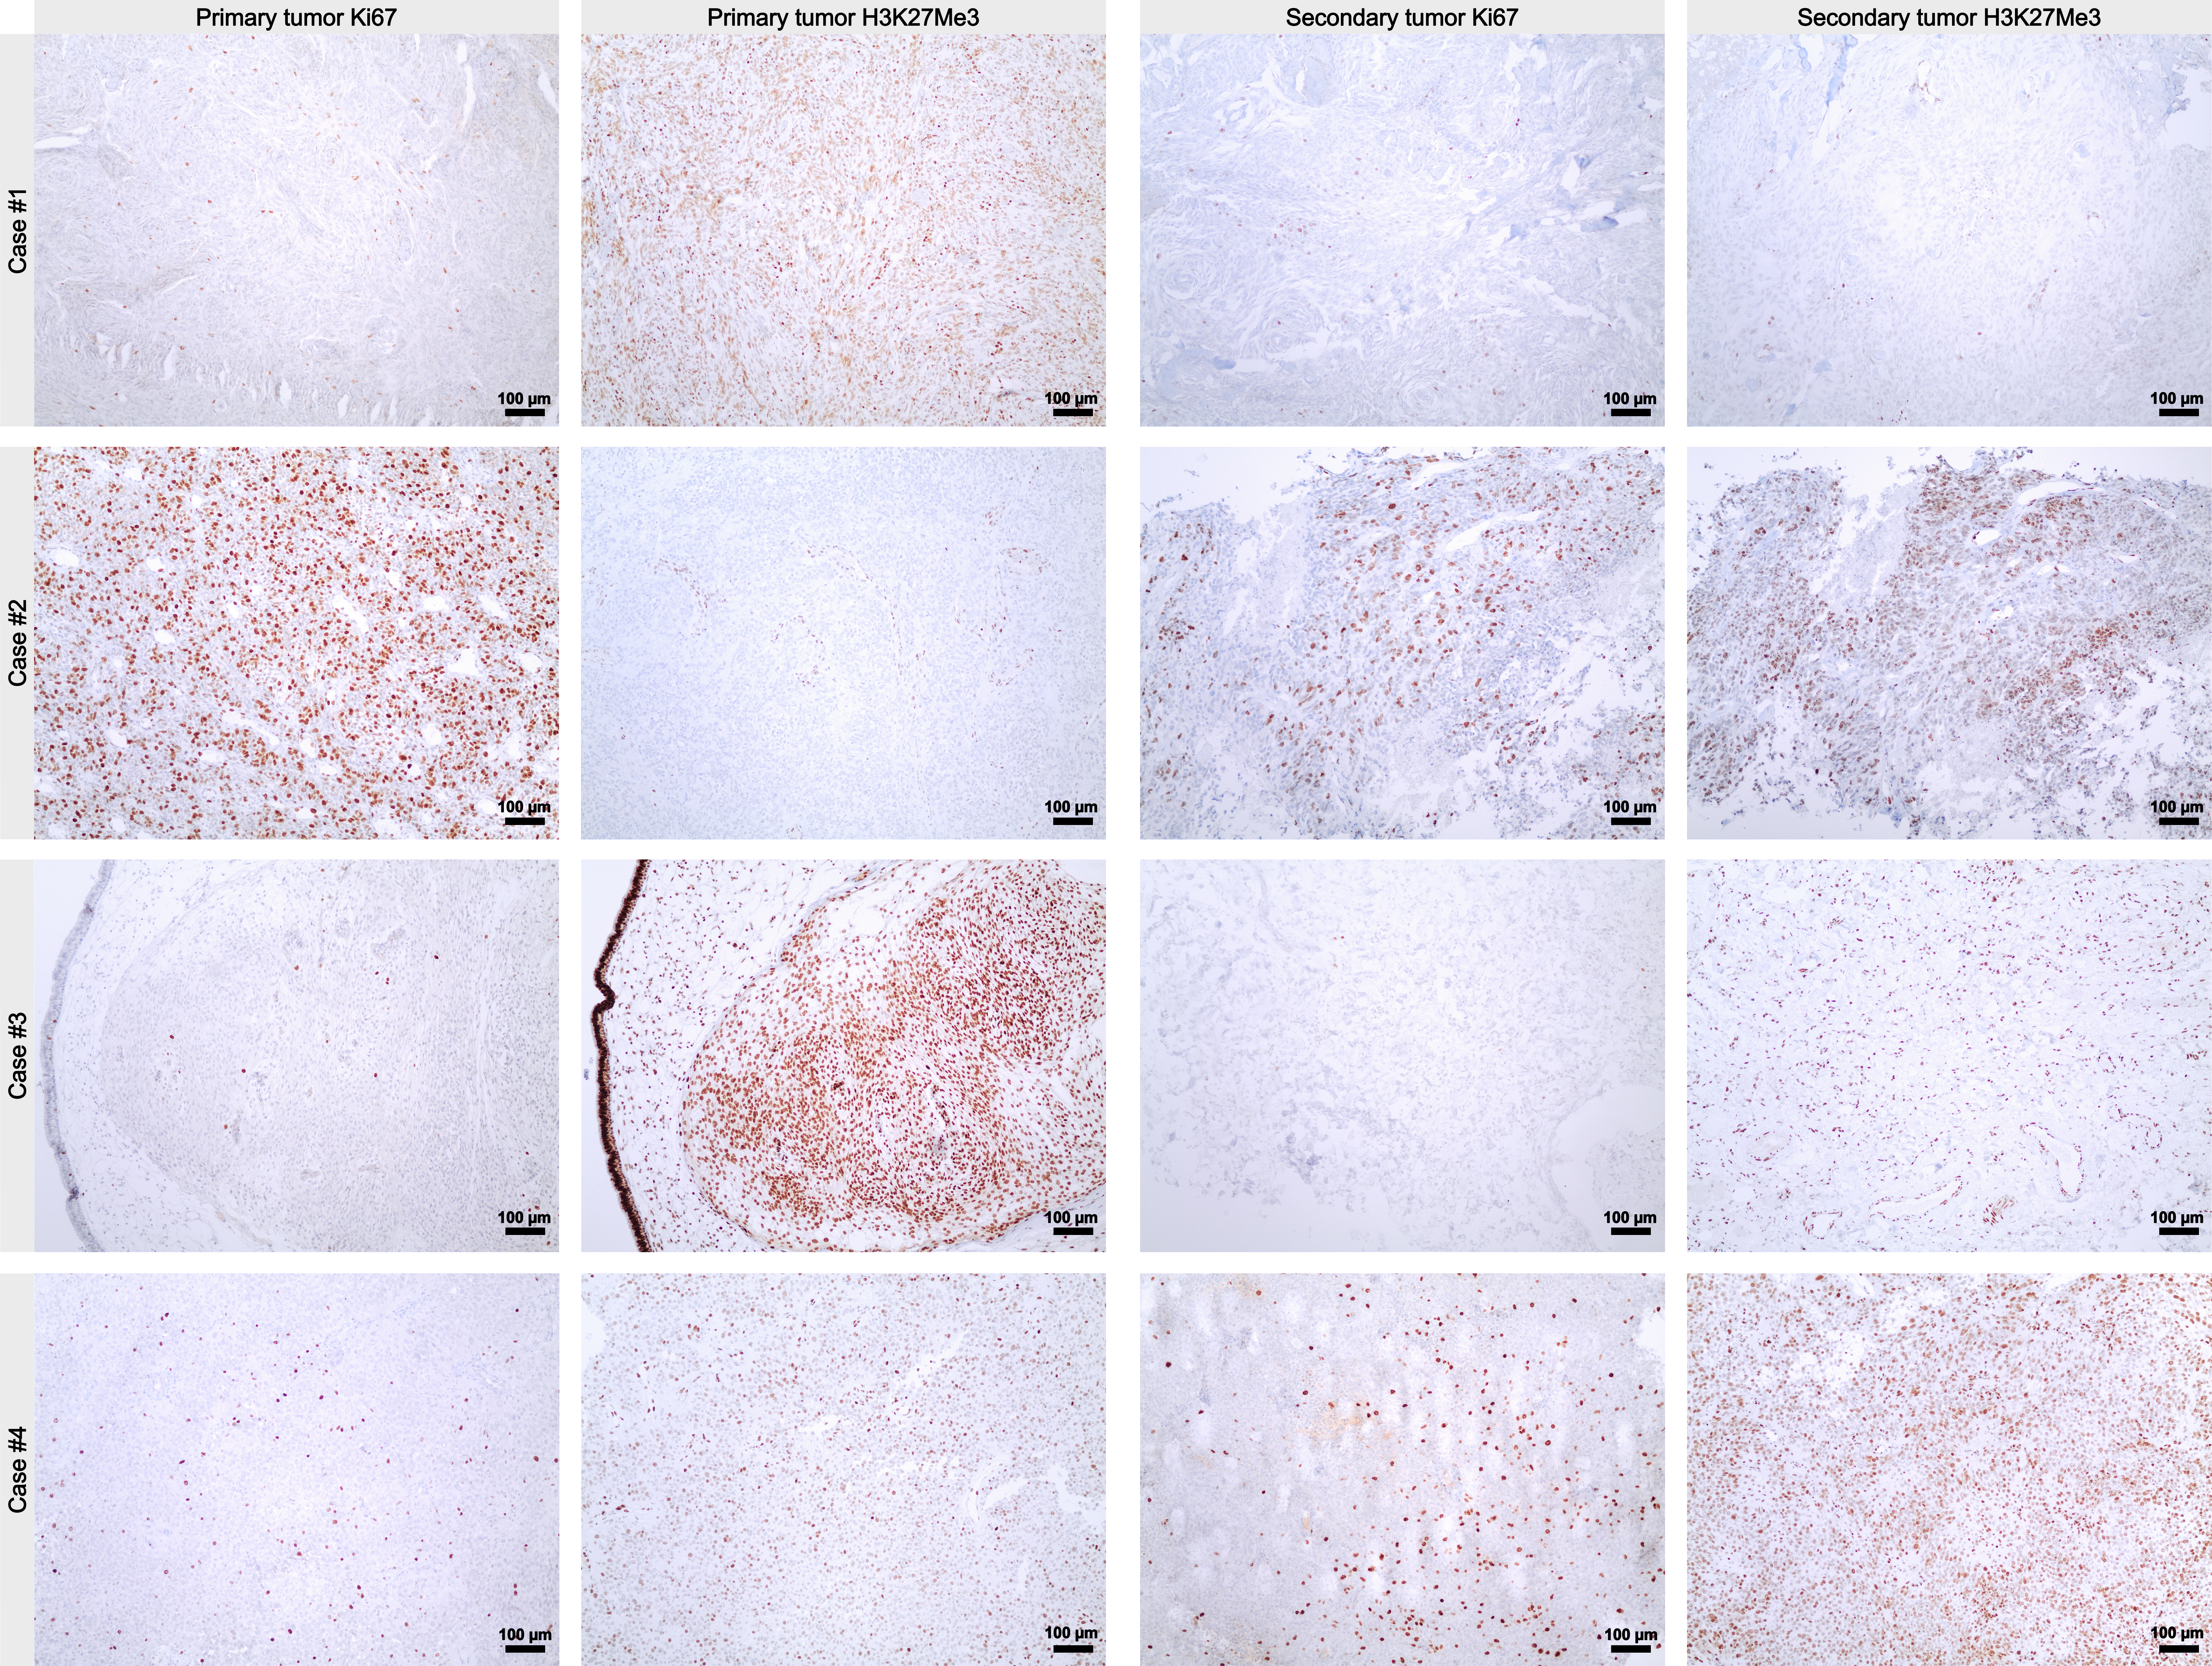

Supplement: MOESM1 [file 40478_2023_1505_MOESM1_ESM.pdf]
